# Supplementary material for: Nervous system-wide profiling of presynaptic mRNAs reveals regulators of associative memory
Source: PubMed Central journal article supplement (PMC6937282; doi:10.1038/s41598-019-56908-8), 2019-12-30

# **Nervous system-wide profiling of presynaptic mRNAs reveals regulators of associative memory**

Rachel N Arey<sup>1,2</sup>, Rachel Kaletsky<sup>2</sup>, and Coleen T Murphy<sup>2\*</sup>

## **Supplementary Information.**

### **Supplementary Figure S1. Other *puf* mRNAs are neuronally and axonally localized A-C).**

smFISH using Quasar570-labeled probes against individual *puf* mRNAs (*puf-7*, *puf-8*, *puf-11*) in isolated *prab-3::RAB-3::GFP* neurons. Soma are circled and labeled, and neurites are indicated on the images.

### **Table S1. Alignment summary of Sequencing Data**

### **Table S2. List of Synapse expressed genes and Gene Ontology for synapse expressed genes**

### **Table S3. Results of DESeq2 analysis - Synaptic and Somatic DEGs**

### **Table S4. Lists of mammalian orthologs of synaptic DEGs**

### **Table S5. Motif analysis summary of synaptic mRNA 3'UTRs**

A

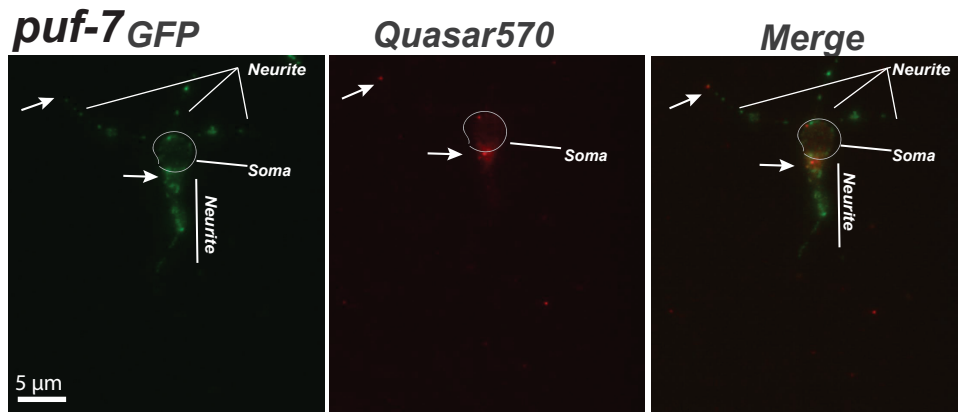

B

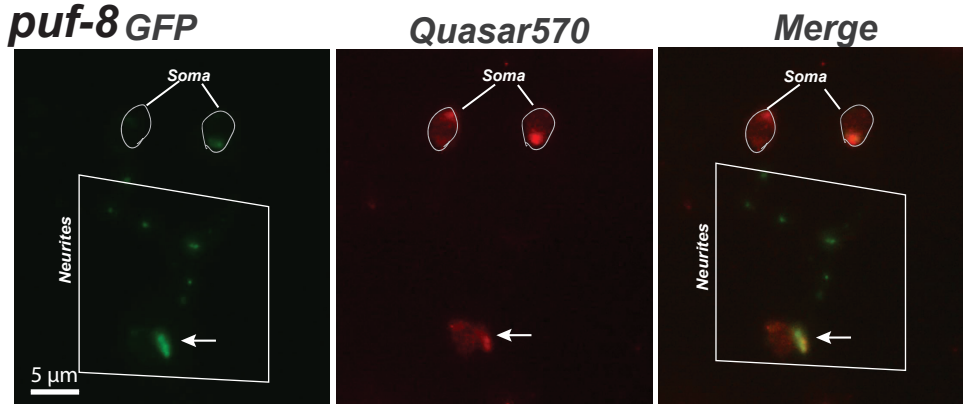

C

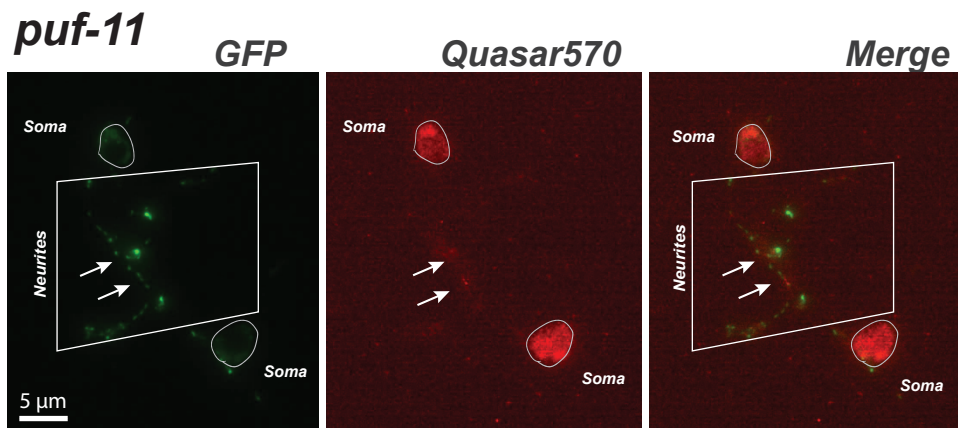

Supplement: 41598_2019_56908_MOESM1_ESM.pdf [file 41598_2019_56908_MOESM1_ESM.pdf]
